# Supplementary material for: SUMOylation of AMPKα1 by PIAS4 specifically regulates mTORC1 signalling
Source: PubMed Central journal article supplement (PMC4674823; doi:10.1038/ncomms9979), 2015-11-30
Supplement: ncomms9979-s1.pdf [file ncomms9979-s1.pdf]

### Supplementary Figure-1 (Makela)

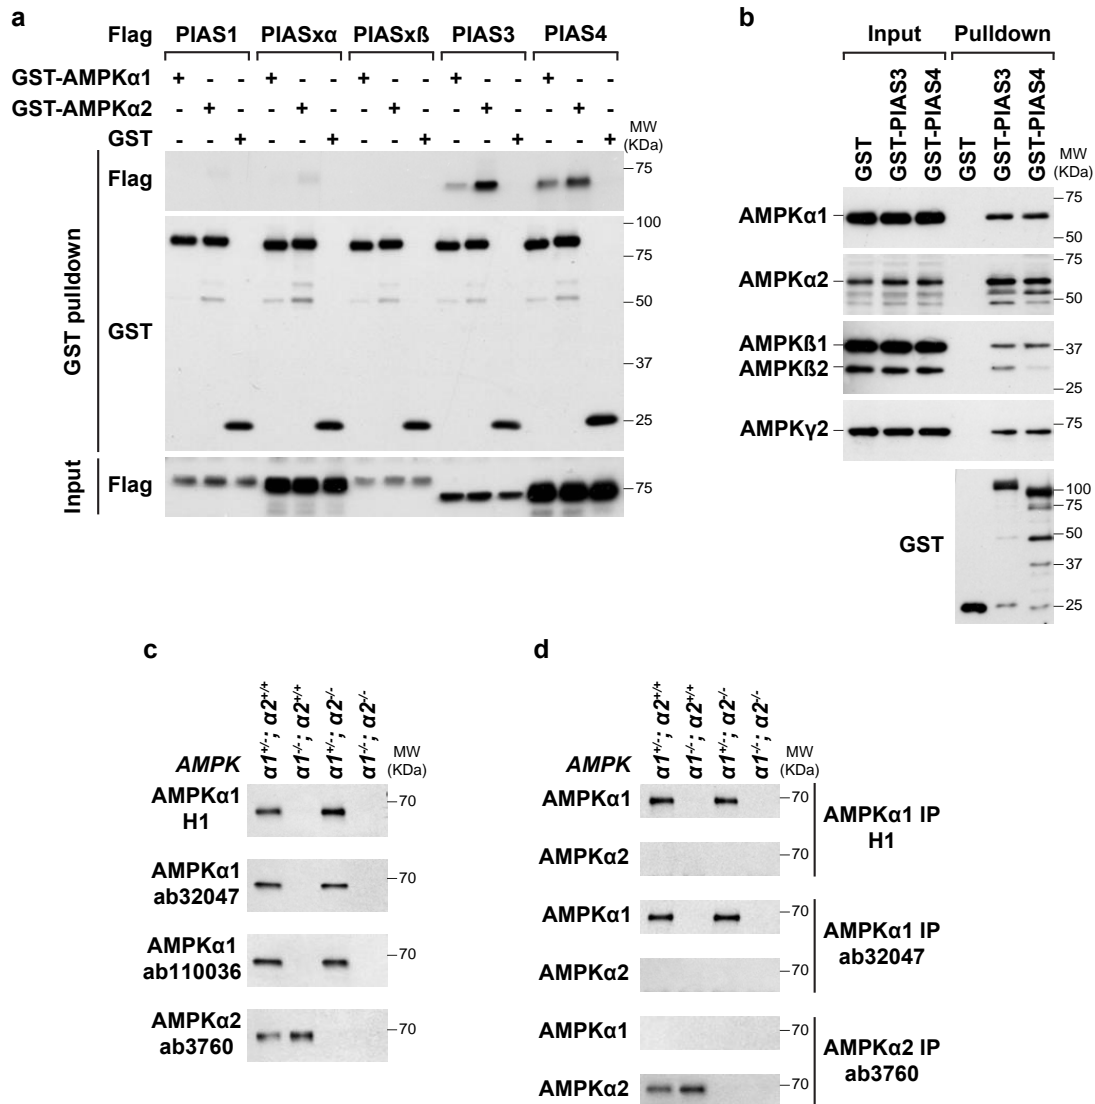

**Supplementary Figure 1. Association of PIAS3 and PIAS4 with endogenous AMPK $\alpha$ , AMPK $\beta$ , and AMPK $\gamma$  subunits.** (a) (Upper panels) Lysates of HEK293 cells cotransfected with plasmids encoding one of the Flag-tagged PIAS family proteins (PIAS1, PIASx $\alpha$ , PIASx $\beta$ , PIAS3, or PIAS4) together with plasmids encoding either GST-AMPK $\alpha$ 1 or GST-AMPK $\alpha$ 2 as indicated were analyzed 24h later following purification with glutathione-sepharose (GST pull-down) by Western blotting analysis with Flag or GST antibodies. (Lower panel) Western blotting analysis of total lysates (Input) with the indicated antibodies. (b) Lysates of HEK293 cells transfected with plasmids encoding GST, GST-PIAS3, or GST-PIAS4 were analyzed 24h later directly (Input) or following purification with glutathione-

sepharose (Pulldown) by Western blotting analysis with antibodies indicated on the left. (c) Cell lysates from immortalized MEFs with variable *AMPK $\alpha$*  genotypes indicated on the top were analyzed by Western blotting using antibodies indicated on the left. (d) Immortalized MEFs with indicated *AMPK $\alpha$*  genotypes on the top were subjected for immunoprecipitation (IP) with indicated AMPK $\alpha$ 1 or AMPK $\alpha$ 2 antibody shown on the right and subsequently analyzed by Western blotting using AMPK $\alpha$ 1 (ab110036, Abcam) or AMPK $\alpha$ 2 (ab3760, Abcam) antibodies indicated on the left.

## Supplementary Figure-2 (Makela)

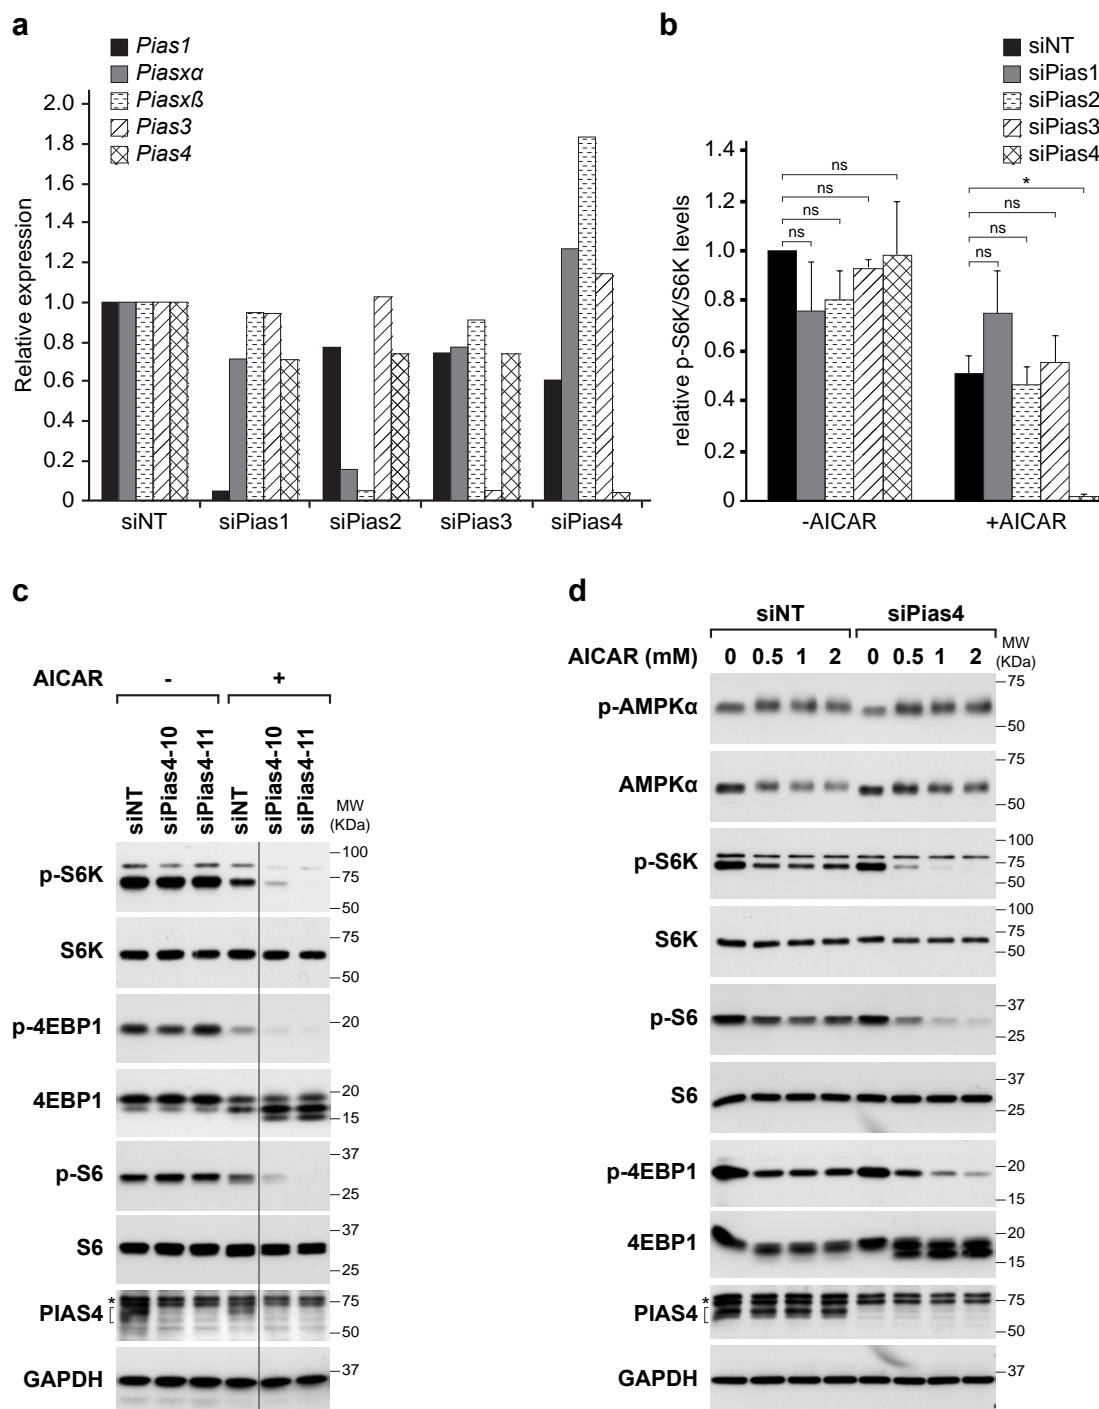

**Supplementary Figure 2. PIAS4 attenuates AMPK inhibition of mTORC1 signaling.** (a) Relative mRNA levels of *Pias1*, *Piasxa*, *Piasxβ*, *Pias3* and *Pias4* were analyzed by qRT-PCR from immortalized MEFs transfected with nontargeting siRNA pool (siNT) or siRNA pools against the indicated mouse *Pias* genes. (b) Relative levels of p-S6K/S6K of immortalized MEFs transfected with indicated siRNAs followed by treatment with vehicle (-AICAR) or 2 mM AICAR (+AICAR). Data are shown as means+SEM (n=2) relative to the -AICAR condition in siNT transfected

cells (with representative images in Fig. 1a). Significances of differences by Student's t-test are indicated (\* $P < 0.05$ , ns  $> 0.05$ ). (c) Immortalized MEFs were transfected with siNT pool or with two independent siRNAs against mouse Pias4 (siPias4-10 and siPias4-11). At 72h post-transfection, cells were treated with vehicle or 2 mM AICAR for 2h and cell lysates were analyzed by Western blotting using the indicated antibodies. For PIAS4 blot, asterisk denotes unspecific signals and bracket denotes specific signals. (d) Immortalized MEFs were transfected with siRNA pools indicated on the top, and 72 hours later treated with the indicated concentrations of AICAR for 2 h following analysis as in (c). For PIAS4 blot, the asterisk denotes unspecific signals and the bracket denotes specific signals.

### Supplementary Figure-3 (Makela)

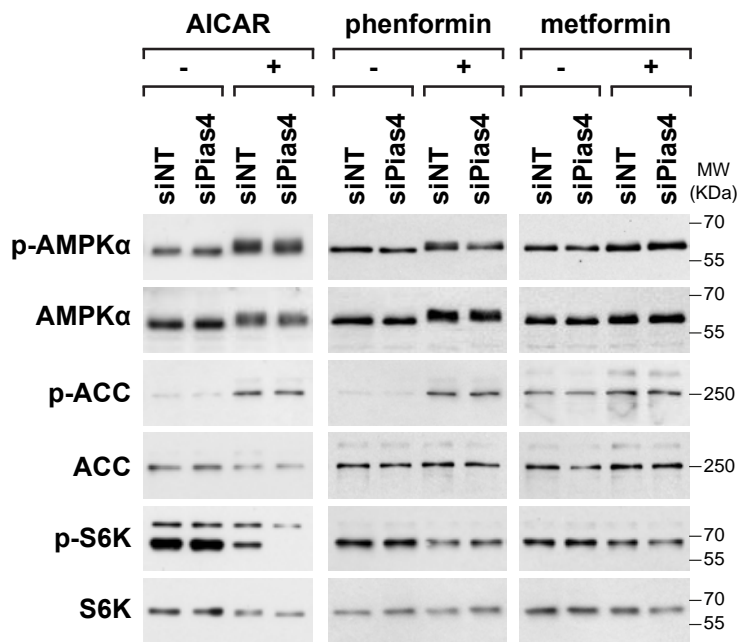

**Supplementary Figure 3. PIAS4 depletion does not affect mTORC1 signaling upon phenformin or metformin treatment.** Immortalized MEFs transfected with siRNA pools indicated on the top were treated with 2 mM AICAR for 2 hours or 5 mM phenformin for 1 hour or 1 mM metformin for 24 hours, and cell lysates were analyzed by Western blotting using the indicated antibodies.

## Supplementary Figure-4 (Makela)

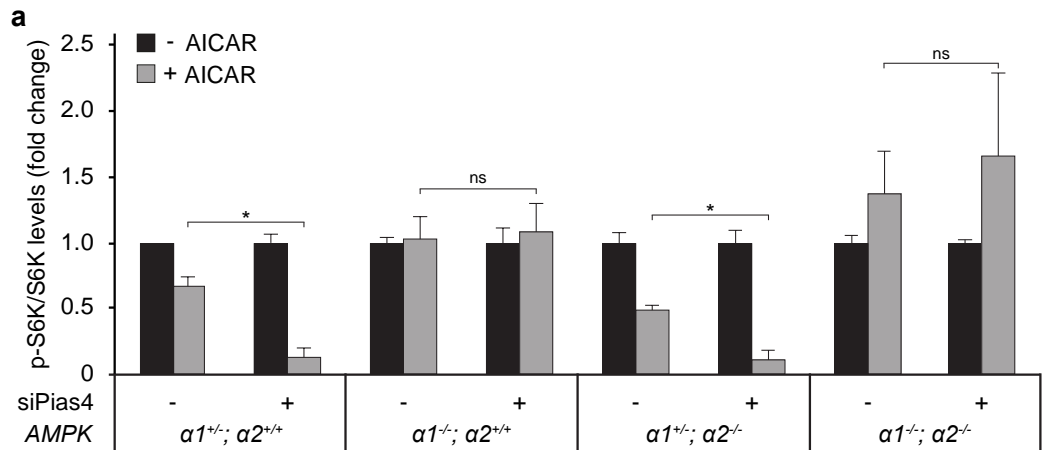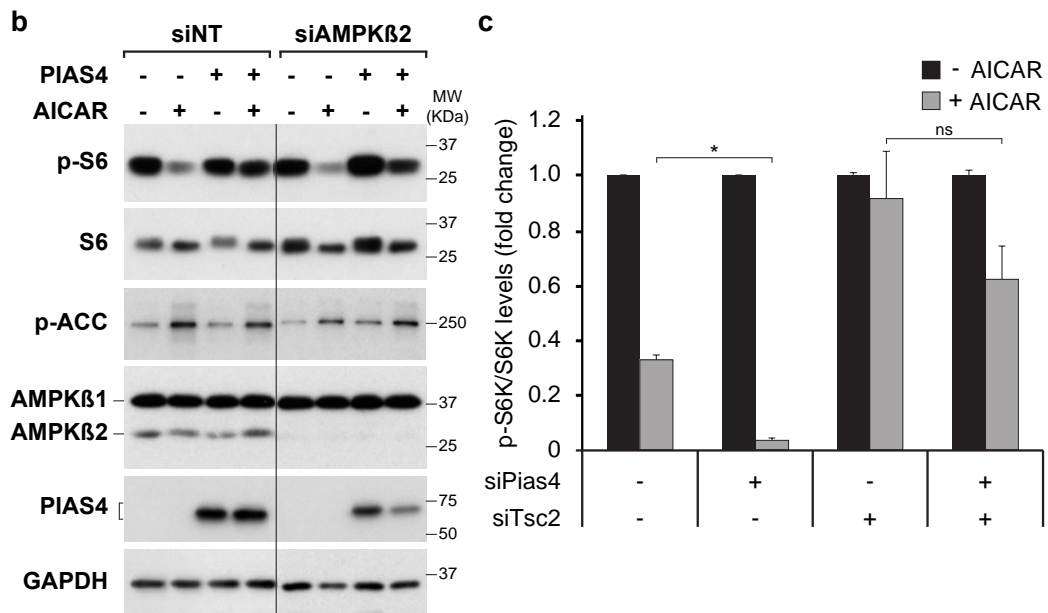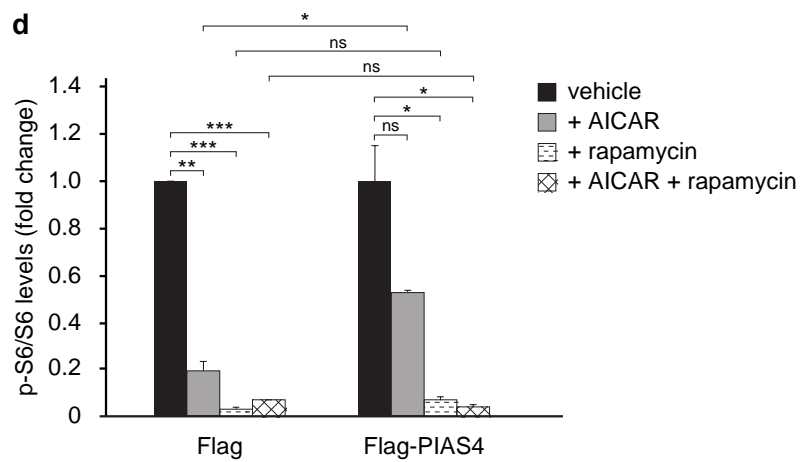

**Supplementary Figure 4. PIAS4 modulates mTORC1 signaling via AMPK  $\alpha$  1 and TSC2.** (a) Relative levels of p-S6K/S6K in immortalized MEFs with variable *AMPK $\alpha$*  genotypes transfected with siNT or siRNA pool against *Pias4* (siPias4) followed by treatment with vehicle (-AICAR) or 2 mM AICAR (+AICAR). Data are shown as means+SEM (n=2) relative to the -AICAR conditions (with representative images in Fig. 2a). Significances of differences by Student's t-test are indicated (\*P<0.05, ns>0.05). (b) NIH3T3 cells were initially transfected with siNT pool or siRNA pool against mouse *Prkab2* (AMPK $\beta$ 2) (siAMPK $\beta$ 2) and 24h later with vector (Flag) or Flag-PIAS4 encoding plasmids. 24h later cells were treated with vehicle (-) or 2 mM AICAR (+) for 2h, and lysed for SDS-PAGE and Western blotting analysis with the indicated antibodies. (c) Relative levels of p-S6K/S6K in immortalized MEFs transfected with siPias4 pool or siRNA pool against mouse *Tsc2* (siTsc2) or both as indicated followed by treatment with vehicle (-AICAR) or 2 mM AICAR (+AICAR). Data are shown as means+SEM (n=2) relative to the -AICAR conditions (with representative images in Fig. 2b). Significances of differences by Student's t-test are indicated (\*P<0.05, ns>0.05). (d) Relative levels of p-S6/S6 in NIH3T3 cells transfected with vector control (Flag) or Flag-PIAS4 plasmids followed by treatment with vehicle, 2 mM AICAR (+AICAR), 50 nM rapamycin (+rapamycin) or both (+AICAR+rapamycin). Data are shown as means+SEM (n=2) relative to the vehicle control conditions (with representative images in Fig. 2c). Significances of differences by Student's t-test are indicated (\*\*\*<0.001, \*\*<0.01, \*P<0.05, ns>0.05).

## Supplementary Figure-5 (Makela)

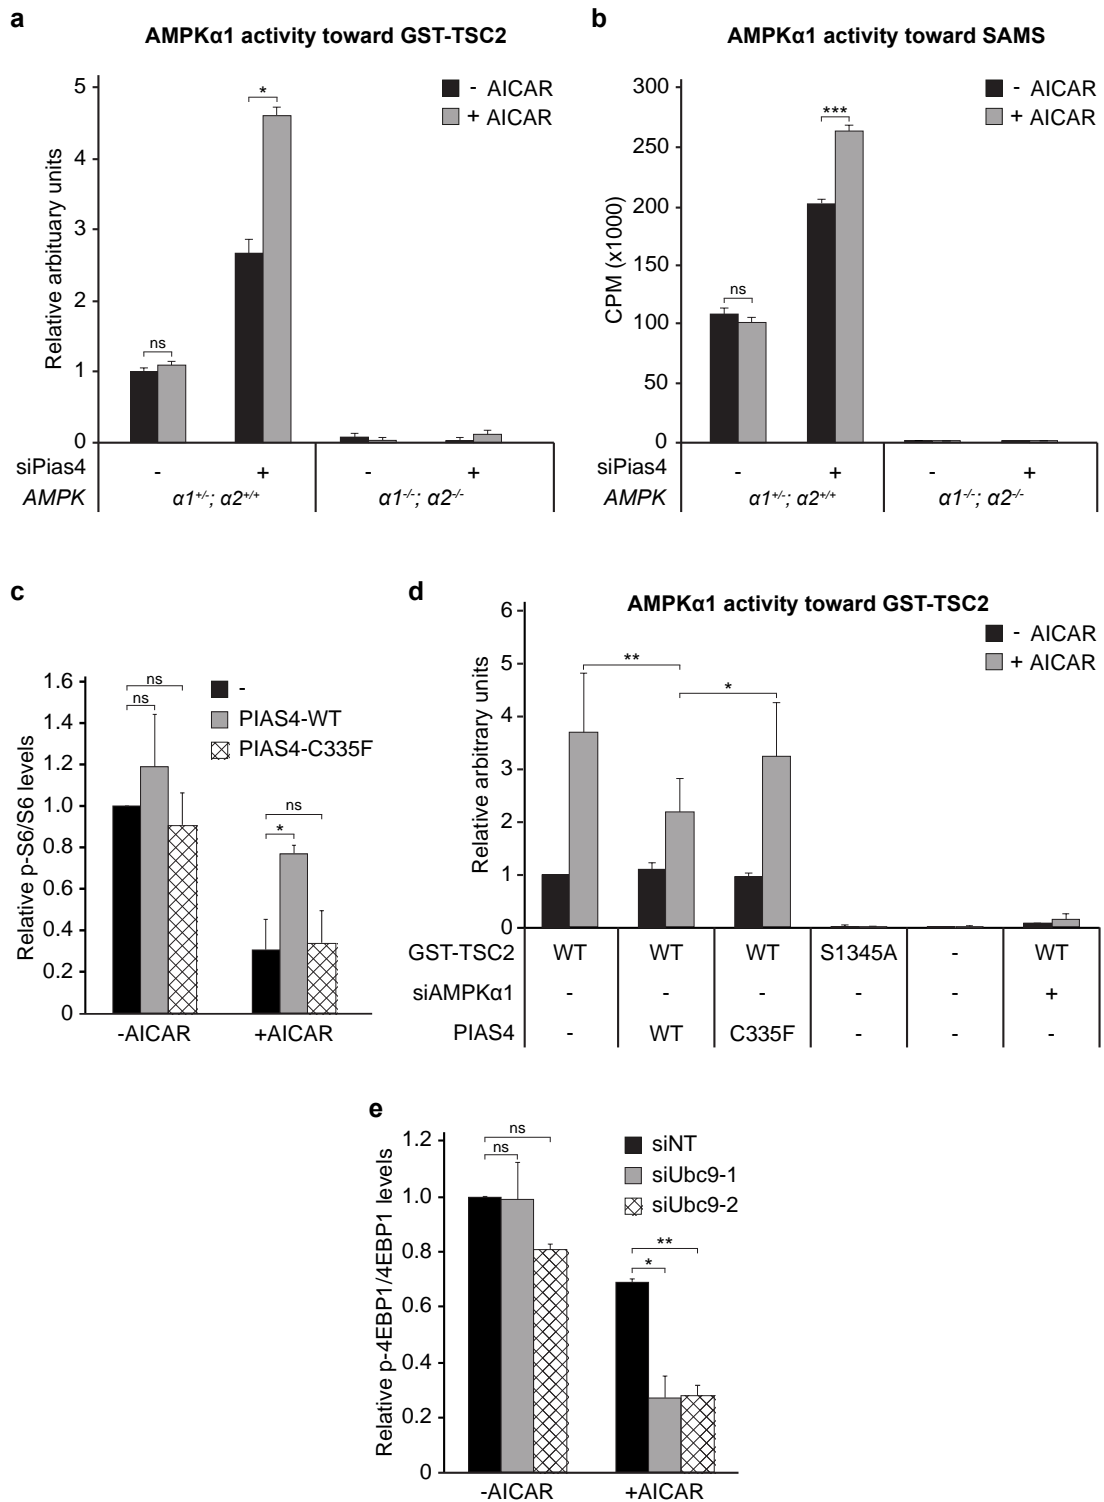



**Supplementary Figure 5. PIAS4 inhibits AMPK $\alpha$ 1 kinase activity in a SUMO E3 ligase dependent manner.** (a) Relative arbitrary units (means + SEM, n=3) of  $^{32}\text{P}$  autoradiography intensity (See Methods) of AMPK $\alpha$ 1 kinase assay using GST-TSC2 recombinant proteins as substrates (with representative images in Fig. 3a). Significances of differences by Student's t-test are indicated (\*P<0.05, NS>0.05). (b) Immortalized *AMPK $\alpha$ 1<sup>+/-</sup>;  $\alpha$ 2<sup>+/+</sup>* or *AMPK $\alpha$ 1<sup>-/-</sup>;  $\alpha$ 2<sup>-/-</sup>* MEFs indicated at the bottom of each chart were transfected with siNT pool or siPias4 pool and 72h later cells were treated with vehicle (-) or 2 mM AICAR for 2h. 25 $\mu\text{g}$  of cell lysates from each treatment were used for AMPK $\alpha$ 1 immunoprecipitation and immunoprecipitates were used to phosphorylate 2.5 $\mu\text{g}$  SAMS peptide *in vitro* in the presence of [ $\gamma$ - $^{32}\text{P}$ ] ATP followed by scintillation counting. Data are means+SEM (n=3). Significances of differences by Student's t-test are indicated (\*\*\*P<0.001, NS>0.05). (c) Relative levels of p-S6/S6 in NIH3T3 cells transfected with vector control (-), Flag-PIAS4-WT (WT) or Flag-PIAS4-C335F (C335F) plasmids followed by treatment with vehicle (-AICAR) or 2 mM AICAR (+AICAR). Data are shown as means+SEM (n=2) relative to the -AICAR condition in Flag transfected cells (with representative images in Fig. 3b). Significances of differences by Student's t-test are indicated (\*P<0.05, ns>0.05). (d) Relative arbitrary units (mean+SEM, n=3) of  $^{32}\text{P}$  autoradiography intensity (See Methods) of AMPK $\alpha$ 1 kinase activity using GST-TSC2 recombinant proteins as substrates (with representative images in Fig. 3c). Significances of differences by Student's t-test are indicated (\*\*P<0.01, \*P<0.05). (e) Relative levels of p-4EBP1/4EBP1 in immortalized MEFs transfected with siNT pool or two independent siRNAs against mouse Ubc9 (siUbc9-1 and siUbc9-2) followed by treatment with vehicle (-AICAR) or 2 mM AICAR (+AICAR). Data are shown as means+SEM (n=2) relative to the -AICAR condition in siNT transfected cells (with representative images in Fig. 3d). Significances of differences by Student's t-test are indicated (\*\*P<0.01, \*P<0.05, ns>0.05).

## Supplementary Figure-6 (Makela)

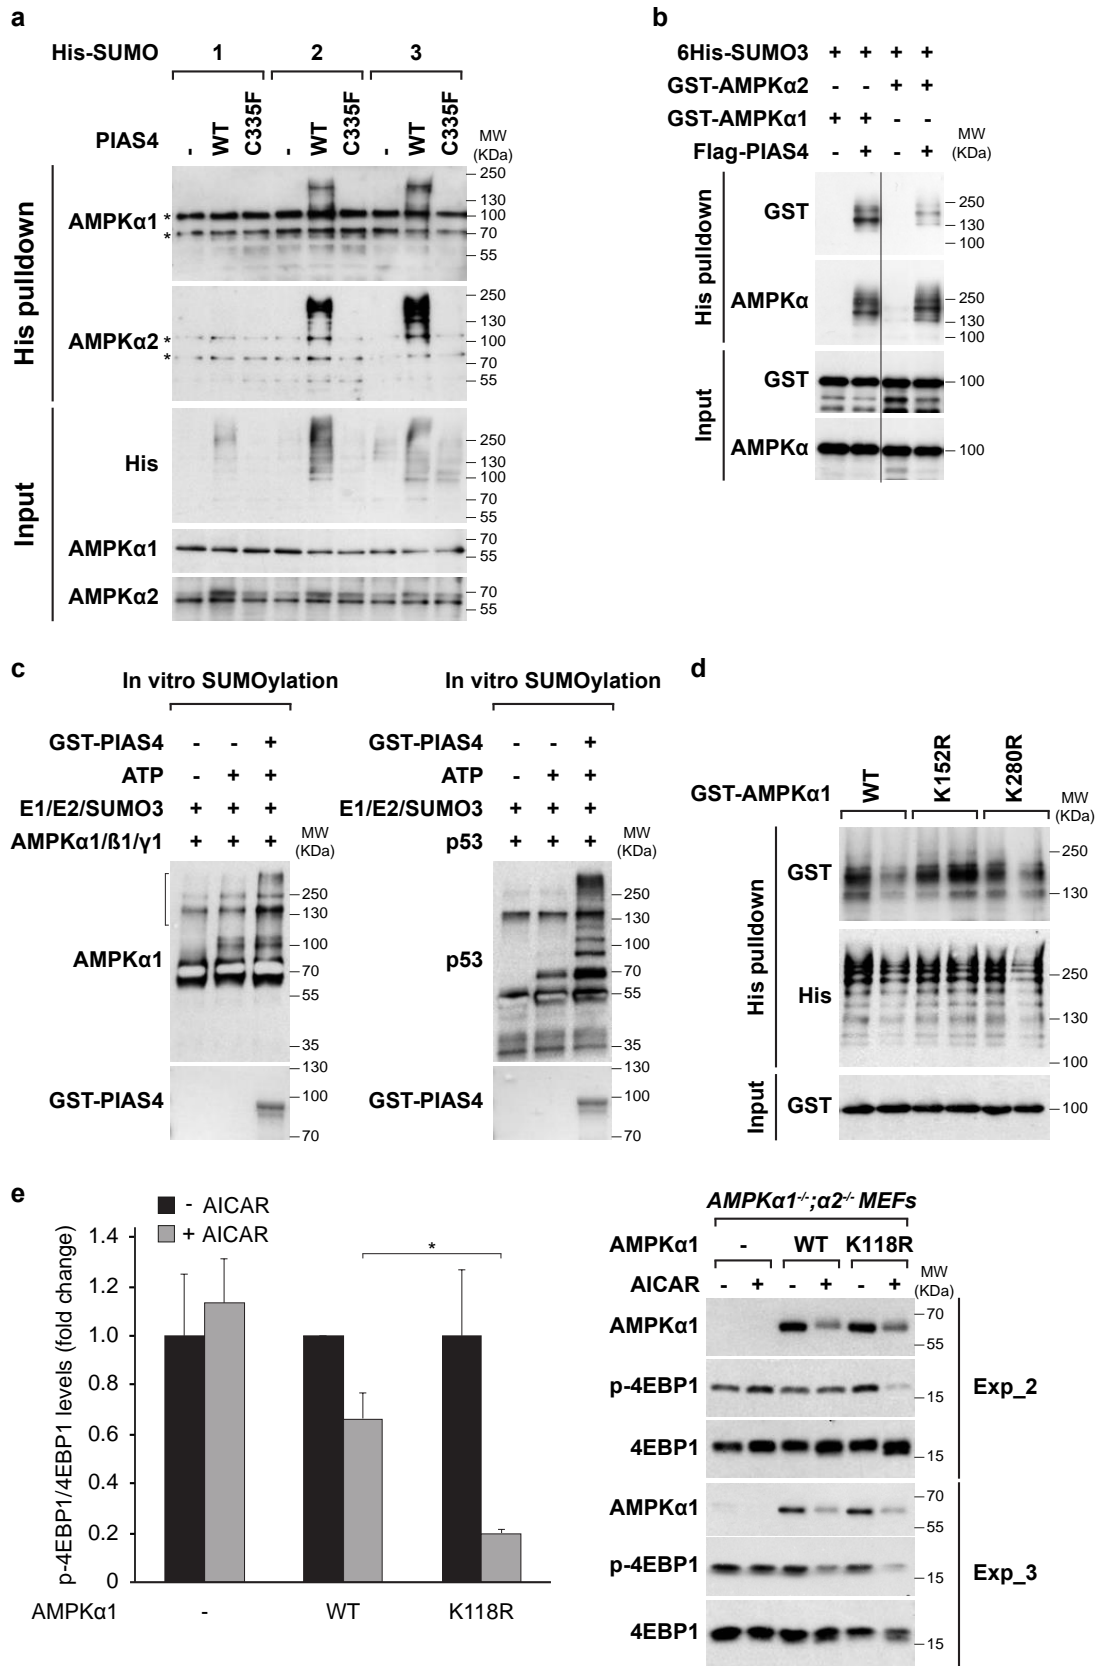

**Supplementary Figure 6. SUMOylation of AMPK $\alpha$ 1 and AMPK $\alpha$ 2 by SUMO2 and SUMO3.** (a) (Upper panels) Western blotting analysis using anti-AMPK $\alpha$ 1 or anti-AMPK $\alpha$ 2 antibodies from His-pulldown prepared from denaturing lysates of HEK293 cells co-transfected with plasmids encoding 6His-SUMO1 or SUMO2 or SUMO3 and either Flag (-) or Flag-PIAS4-WT (WT) or Flag-PIAS4-C335F (C335F). (Lower panels) Western blotting analysis of total lysates (Input) with the indicated antibodies. The asterisks denote unspecific signals. (b) (Upper panels) Western blotting analysis using anti-GST or anti-AMPK $\alpha$  antibodies from His-pulldown prepared from denaturing lysates of HEK293 cells co-transfected with plasmids encoding 6His-SUMO3 and either Flag (-) or Flag-PIAS4 (+) and either GST-AMPK $\alpha$ 1 or GST-AMPK $\alpha$ 2. (Lower panels) Western blotting analysis of total lysates (Input) with the indicated antibodies. (c) (Left panels) Western blotting analysis using anti-AMPK $\alpha$ 1 antibody from *in vitro* SUMOylation assay assembled using recombinant AMPK ( $\alpha$ 1,  $\beta$ 1,  $\gamma$ 1) protein and recombinant SUMO E1, E2, SUMO3 in the absence or presence of GST-PIAS4 or ATP. GST-PIAS4 proteins were visualized with Coomassie Blue stain in the lower panel. Increase of AMPK $\alpha$ 1 SUMOylation by GST-PIAS4 was noted at high molecular weight denoted by bracket. (Right panels) Western blotting analysis using anti-p53 antibody from *in vitro* SUMOylation assay assembled as described above using recombinant p53 as substrates in the absence or presence of GST-PIAS4 or ATP. GST-PIAS4 proteins were visualized with Coomassie Blue stain in the lower panel. (d) (Upper panels) Western blotting analysis using anti-GST or anti-His antibodies from His-pulldown prepared from denaturing lysates of HEK293 cells co-transfected with plasmids encoding 6His-SUMO3 and Flag-PIAS4 and either WT or K152R or K280R form of GST-AMPK $\alpha$ 1. (Lower panel) Western blotting analysis of total lysates (Input) with the anti-GST antibodies. (e) (Left panels) Relative levels of p-4EBP1/4EBP1 of control vector (-), AMPK $\alpha$ 1-WT (WT) or AMPK $\alpha$ 1-K118R (K118R) reconstituted *AMPK $\alpha$ 1<sup>-/-</sup>;  $\alpha$ 2<sup>-/-</sup>* MEFs treated with vehicle (-AICAR) or 2 mM AICAR (+AICAR). Data are shown as means+SEM (n=3) relative to the -AICAR conditions (with representative images in Fig. 4e). Significances of differences by Student's t-test are indicated (\*P<0.05). (Right panels) Western blotting analysis of cell lysates from two additional independent experiments (denoted by Exp\_2 and Exp\_3) using AMPK $\alpha$ 1, p-4EBP1 and 4EBP1 antibodies.

## Supplementary Figure-7 (Makela)

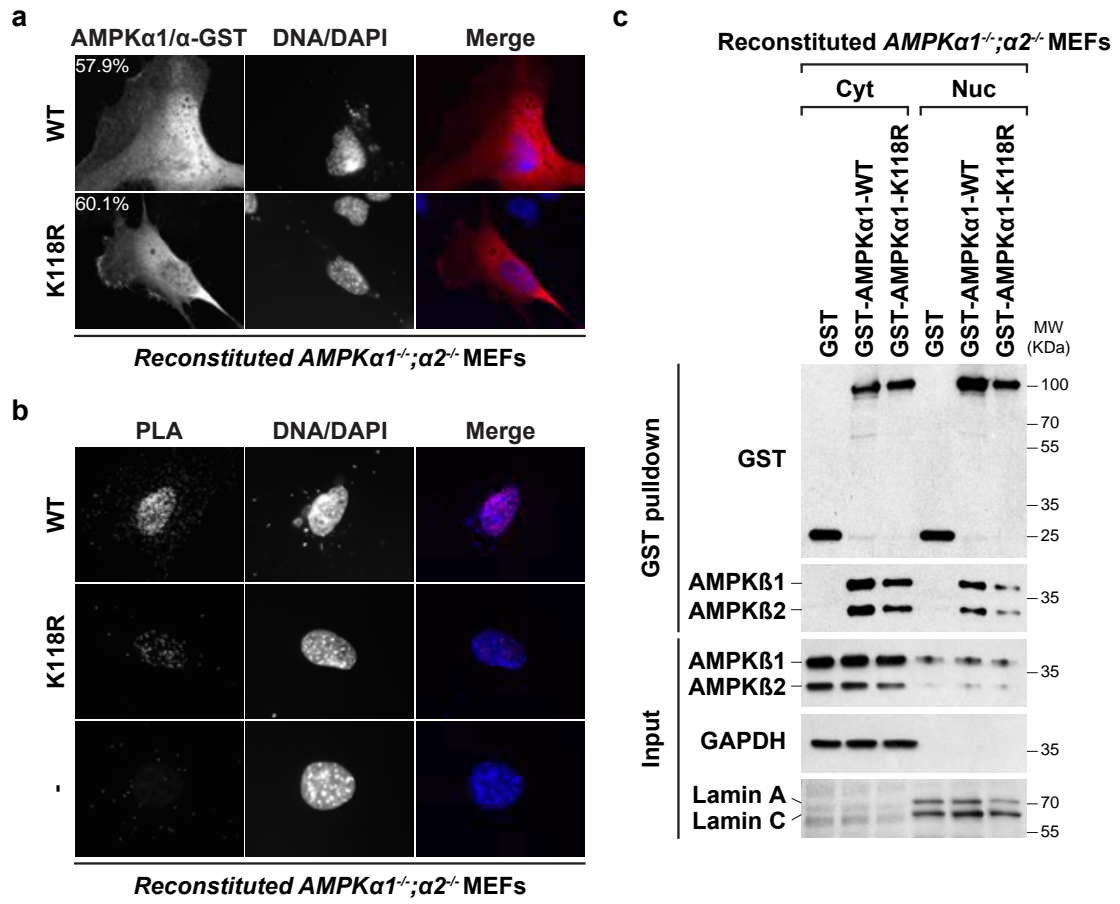

**Supplementary Figure 7. Effects of SUMOylation on AMPK $\alpha$ 1 subcellular localization and localization of SUMOylated AMPK $\alpha$ 1 detected by proximity ligation assay (PLA).** (a) Anti-GST immunofluorescence staining of immortalized *AMPK $\alpha$ 1<sup>-/-</sup>;  $\alpha$ 2<sup>-/-</sup>* MEFs transfected with GST-AMPK $\alpha$ 1-WT or GST-AMPK $\alpha$ 1-K118R followed by 2h treatment with 2 mM AICAR. DNA was stained with DAPI. The percentages on the upper-left corner show the quantification of cytoplasmic GST-AMPK $\alpha$ 1 expressed as a percentage of total GST-AMPK $\alpha$ 1 for each identified transfected cells. The mean of cytoplasmic GST-AMPK $\alpha$ 1 for wildtype (WT) (696 cells) and K118R (842 cells) from 3 equally weighed independent experiments were compared with Student's t-test (\*P<0.05). (b) Immortalized *AMPK $\alpha$ 1<sup>-/-</sup>;  $\alpha$ 2<sup>-/-</sup>* MEFs transfected with GST (-), GST-AMPK $\alpha$ 1-WT (WT) or GST-AMPK $\alpha$ 1-K118R (K118R) indicated on the left followed by treatment with 2 mM AICAR for 2 h were subjected for proximity ligase assay (PLA) using rabbit anti-GST and mouse anti-SUMO2/3 specific antibodies. DNA was stained with DAPI. PLA signal was not detected from control (-) MEFs, whereas a strong and predominantly nuclear PLA signal (83.4% nuclear PLA signal vs 16.6% cytoplasmic PLA signal) was detected in AMPK $\alpha$ 1-WT cells. Quantification of PLA signal (See Methods) in AMPK $\alpha$ 1-K118R showed less PLA positive cells and weaker PLA signal per positive cells, resulting in a decrease in total PLA signal in AMPK $\alpha$ 1-K118R to 3% of that in AMPK $\alpha$ 1-WT (PLA positive cells: 1.4% in AMPK $\alpha$ 1-K118R vs 16.3% in AMPK $\alpha$ 1-WT, p<0.0001, Student's t-test; transfection efficiency: 21% GST positive cells in both AMPK $\alpha$ 1-WT and AMPK $\alpha$ 1-K118R; mean integrated density of PLA per positive cell: 16445 in AMPK $\alpha$ 1-K118R vs 54273 in AMPK $\alpha$ 1-WT, AMPK $\alpha$ 1-K118R is 30% of AMPK $\alpha$ 1-WT, p<0.01, Student's t-test). (c) Immortalized *AMPK $\alpha$ 1<sup>-/-</sup>;  $\alpha$ 2<sup>-/-</sup>* MEFs transfected as in (b) were treated with 2 mM AICAR for 2 h followed by cytoplasmic (Cyt)-nuclear (Nuc) fractionation. The fractions were analyzed following purification with glutathione-sepharose (GST pulldown) or analyzed directly (Input) by Western blotting with antibodies indicated on the left.

### Supplementary Figure-8 (Makela)

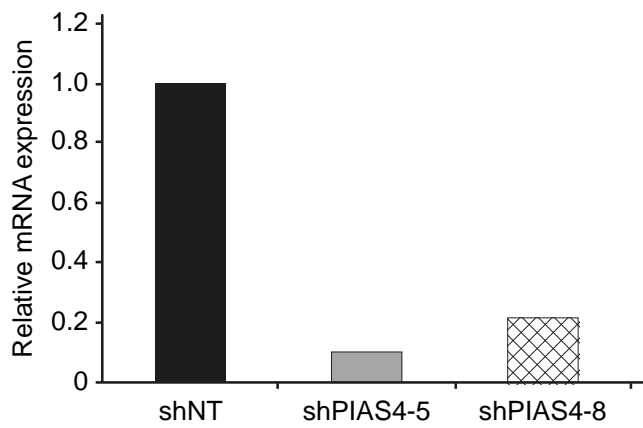

**Supplementary Figure 8. Depletion of PIAS4 in MDA-MB-231 breast cancer cells.** The level of *PIAS4* mRNA relative to *GAPDH* was assessed by RT-qPCR from the indicated lentivirus transduced MDA-MB-231 cells following selection with puromycin (2.5  $\mu\text{g}/\text{ml}$ ) for 1 week.

## Supplementary Figure-9 (Makela)

Uncropped blots for Figure 1a

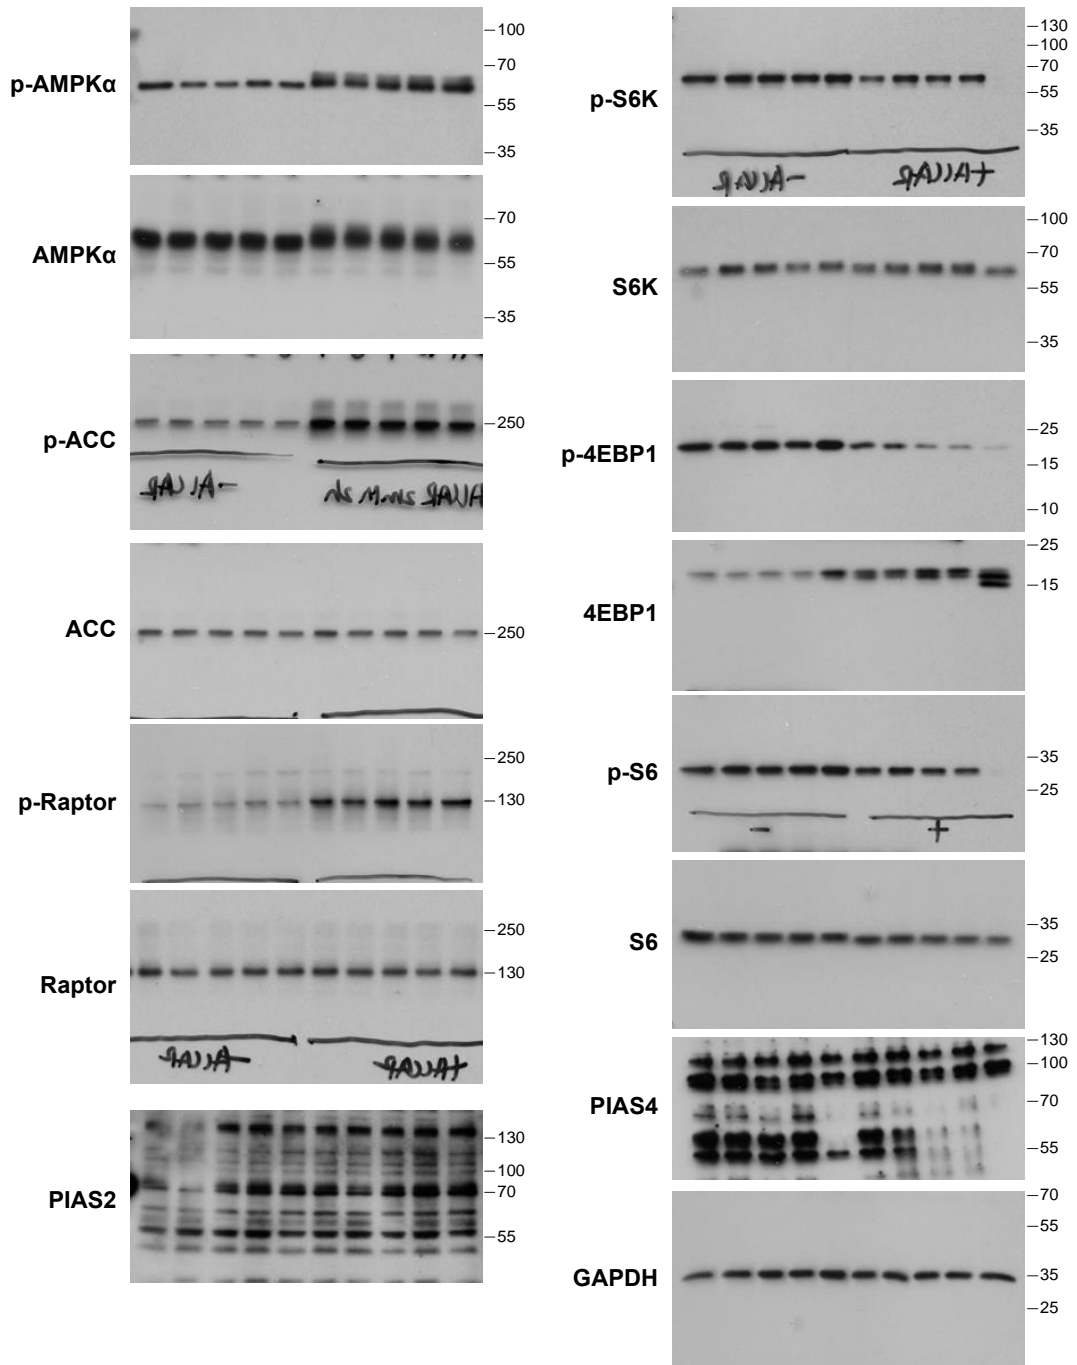

Supplementary Figure 9. Uncropped blots for Figure 1a

### Supplementary Figure-10 (Makela)

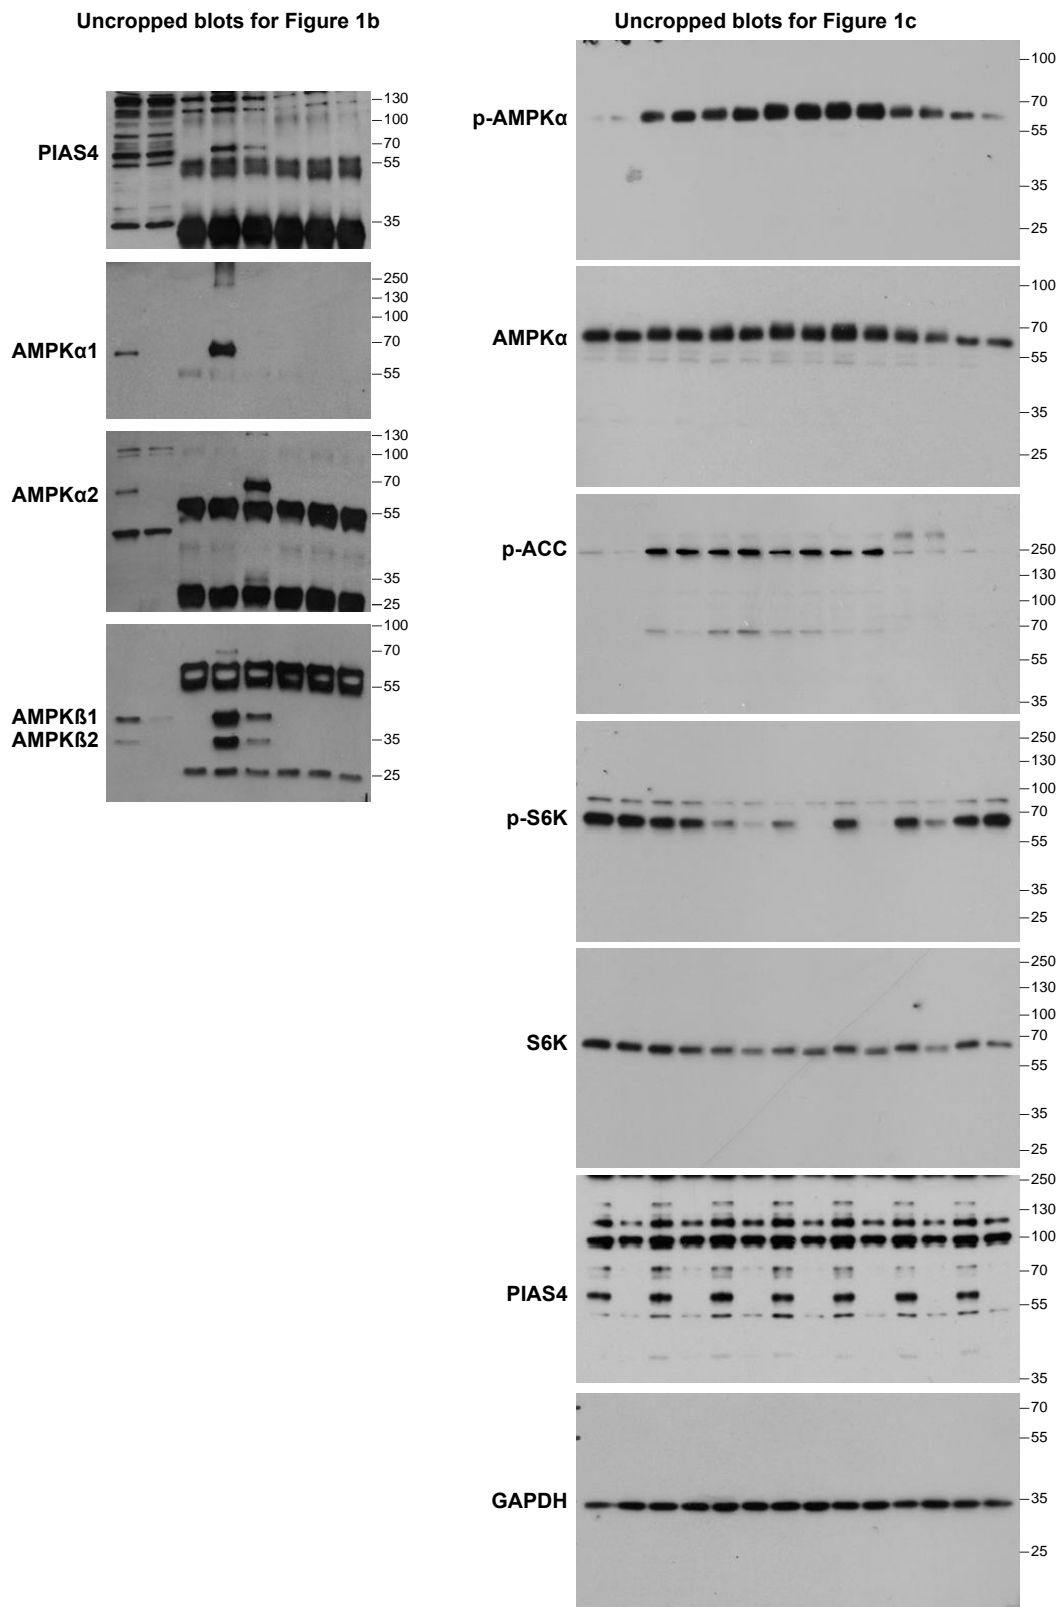

Supplementary Figure 10. Uncropped blots for Figure 1b and Figure 1c



## Supplementary Figure-11 (Makela)

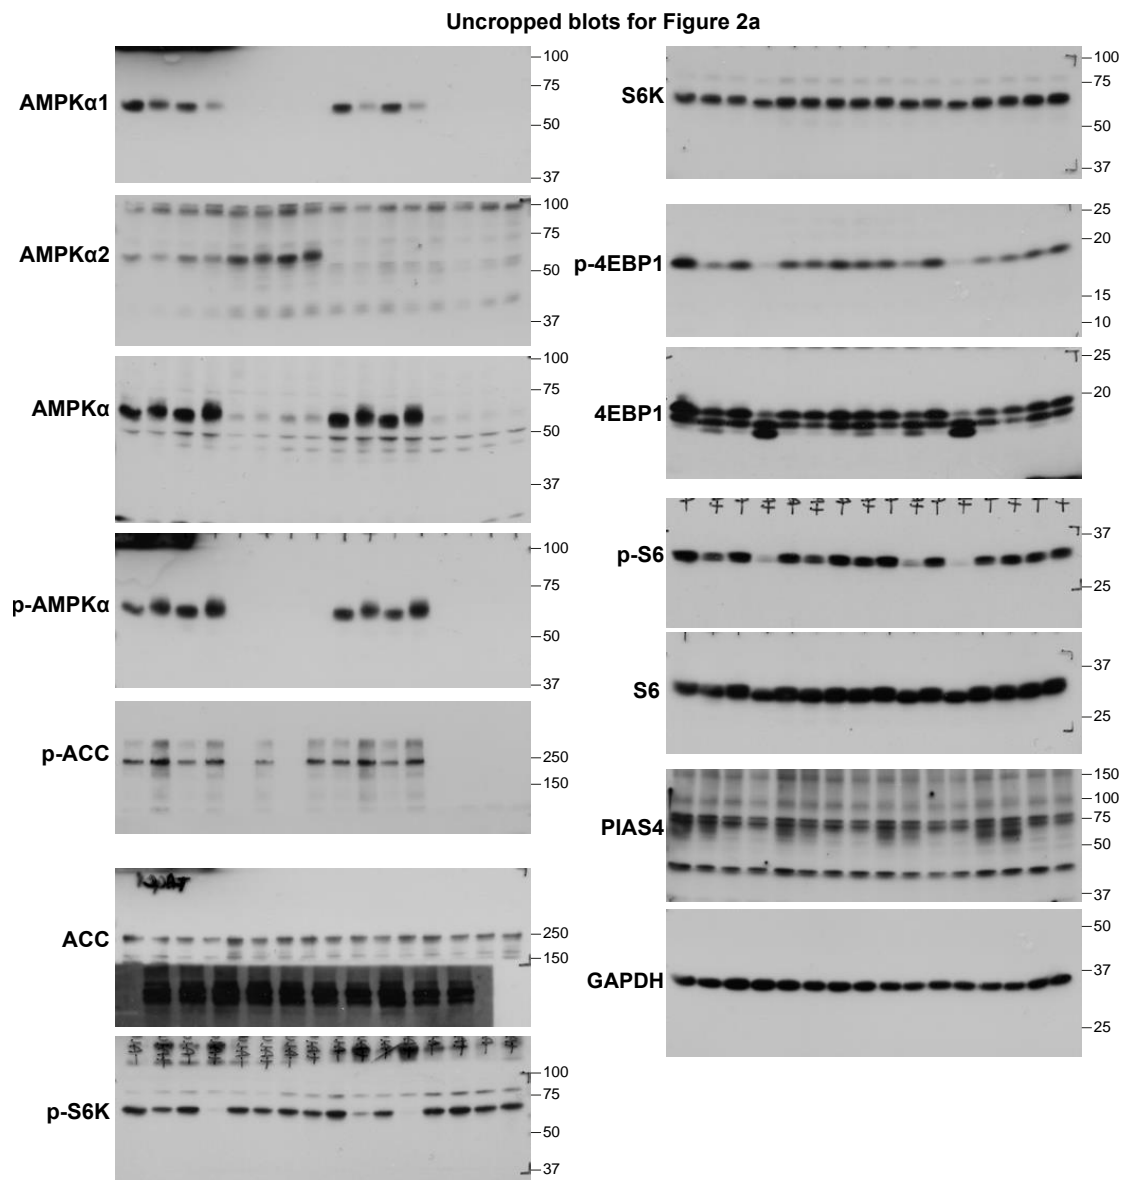

Supplementary Figure 11. Uncropped blots for Figure 2a

**Supplementary Figure-12 (Makela)**

**Uncropped blots for Figure 2b**

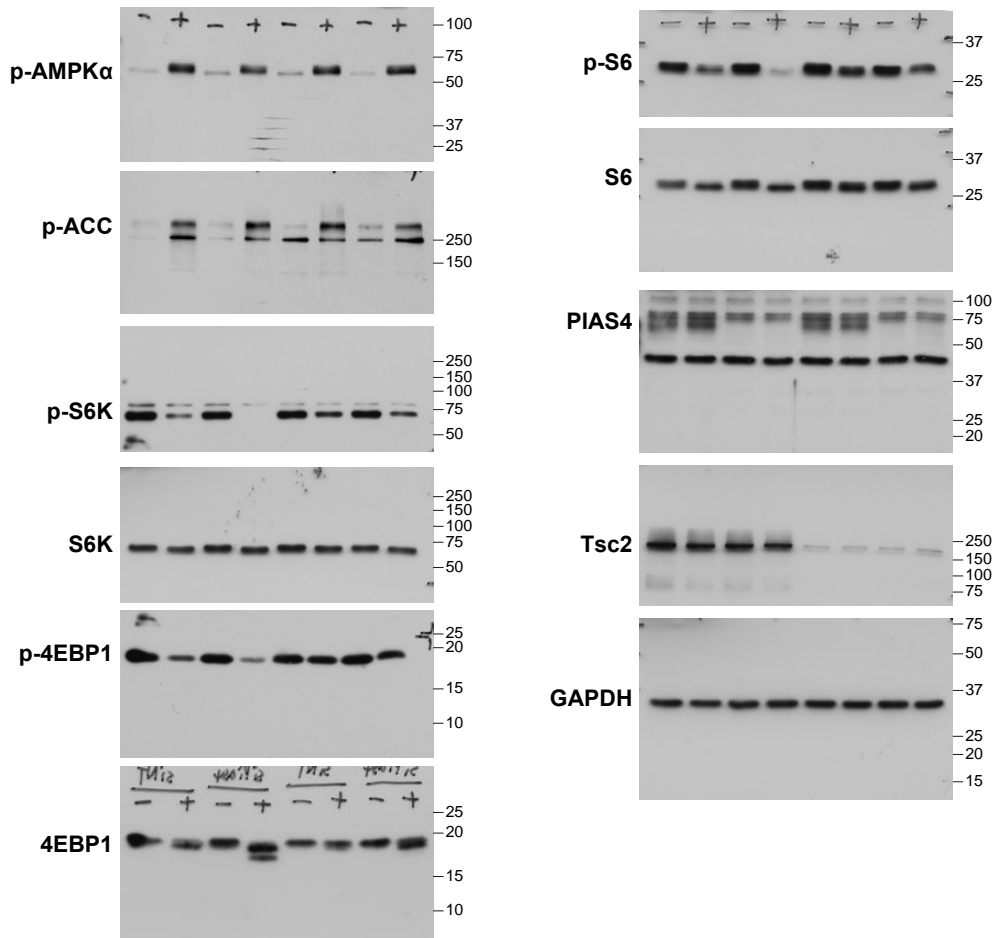

**Uncropped blots for Figure 2c**

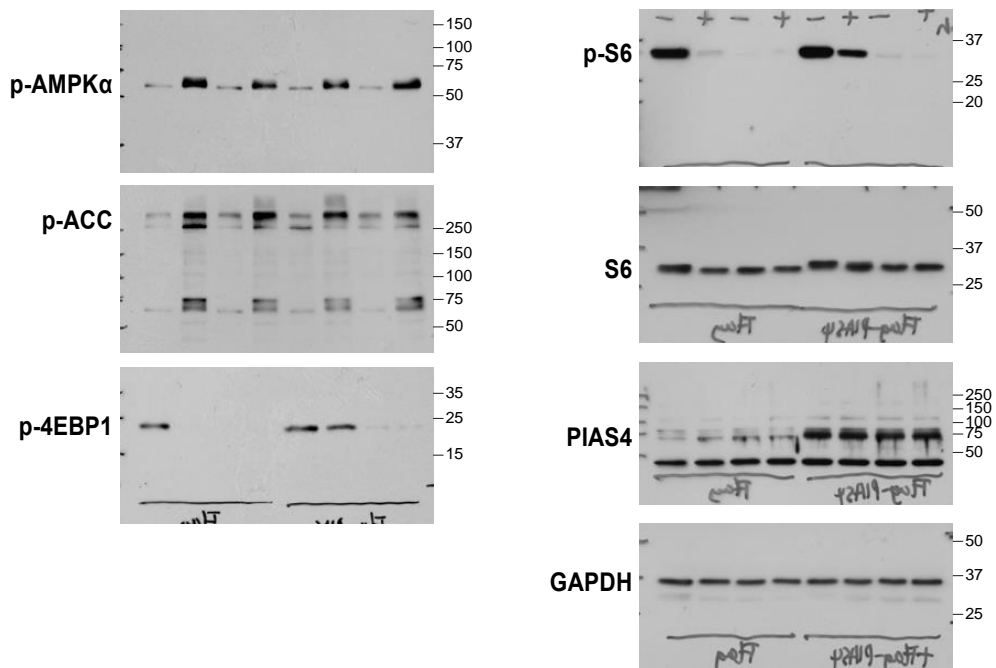

**Supplementary Figure 12. Uncropped blots for Figure 2b and Figure 2c**

**Supplementary Figure-13 (Makela)**

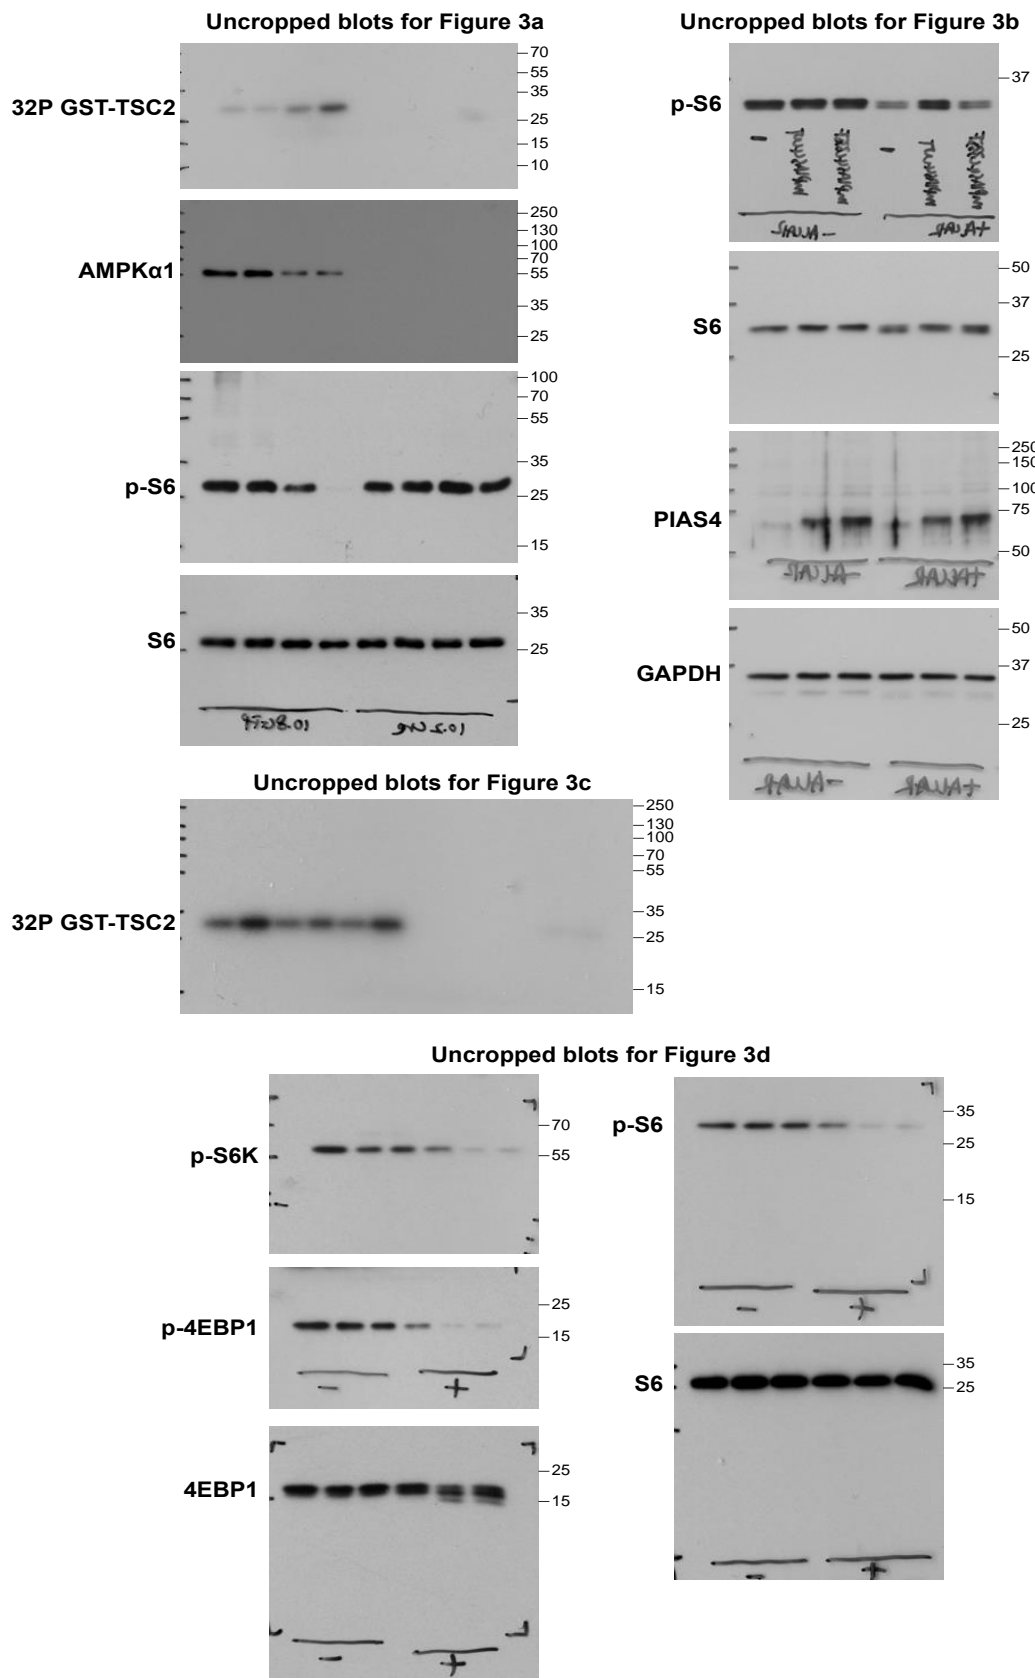

**Supplementary Figure 13. Uncropped blots for Figure 3a, Figure 3b, Figure 3c, and Figure 3d**

**Supplementary Figure-14 (Makela)**

**Uncropped blots for Figure 4e**

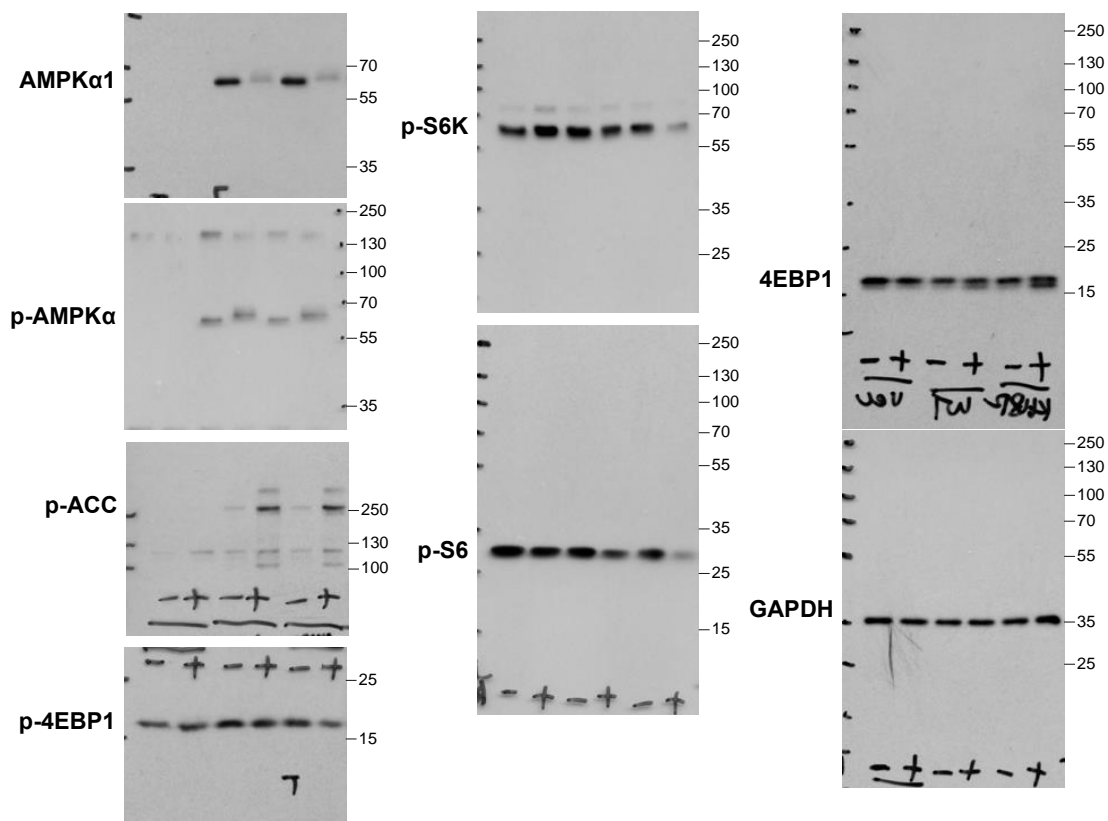

**Uncropped blots for Figure 5a**

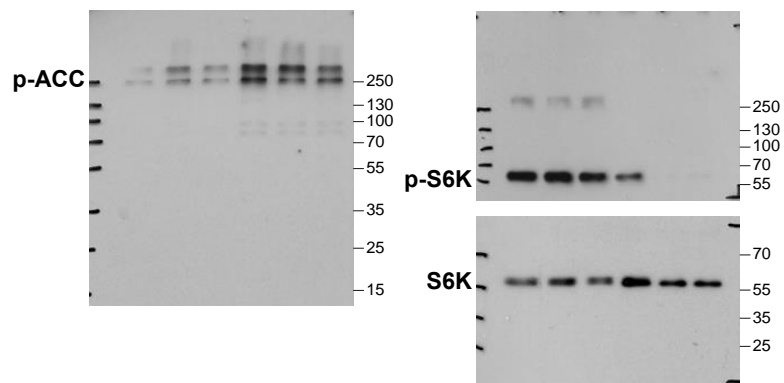

**Supplementary Figure 14. Uncropped blots for Figure 4e and Figure 5a**

**Supplementary Table 1: Clones identified in yeast two-hybrid screens using either AMPK $\alpha$ 1 or AMPK $\alpha$ 2 as baits.**

| Bait            | Library | Gene      | Accession No. | Clones |
|-----------------|---------|-----------|---------------|--------|
| AMPK $\alpha$ 1 | Liver   | RILP      | NM_031430     | 4      |
| AMPK $\alpha$ 1 | Liver   | TRIP6     | NM_003302     | 5      |
| AMPK $\alpha$ 1 | Liver   | DISC1     | NM_018662     | 1      |
| AMPK $\alpha$ 1 | Liver   | C3        | NM_000064     | 1      |
| AMPK $\alpha$ 1 | Liver   | SF4       | NM_172231     | 1      |
| AMPK $\alpha$ 1 | Liver   | SDHB      | NM_003000     | 1      |
| AMPK $\alpha$ 1 | Liver   | YLPM1     | XM_940570     | 1      |
| AMPK $\alpha$ 1 | Liver   | CASP8AP2  | NM_012115     | 1      |
| AMPK $\alpha$ 1 | Brain   | DEAF1     | NM_021008     | 21     |
| AMPK $\alpha$ 1 | Brain   | EWSR1     | NM_005243     | 1      |
| AMPK $\alpha$ 1 | Brain   | C1orf 165 | NM_024603     | 2      |
| AMPK $\alpha$ 1 | Brain   | OS9       | NM_006812     | 1      |
| AMPK $\alpha$ 2 | Liver   | PIAS3     | NM_006099     | 5      |
| AMPK $\alpha$ 2 | Liver   | PPP1R12C  | NM_017607     | 3      |
| AMPK $\alpha$ 2 | Liver   | TRIP6     | NM_003302     | 7      |
| AMPK $\alpha$ 2 | Liver   | SMN1      | NM_000344     | 2      |
| AMPK $\alpha$ 2 | Liver   | DPYS      | NM_001385     | 1      |
| AMPK $\alpha$ 2 | Liver   | PDLIM5    | NM_006457     | 2      |
| AMPK $\alpha$ 2 | Liver   | HNRPK     | BC014980      | 1      |
| AMPK $\alpha$ 2 | Liver   | CTAGE-5B  | AF338234      | 1      |
| AMPK $\alpha$ 2 | Liver   | CFB       | BC007990      | 1      |

|                 |       |         |              |   |
|-----------------|-------|---------|--------------|---|
| AMPK $\alpha$ 2 | Liver | CPS1    | XM_001146466 | 1 |
| AMPK $\alpha$ 2 | Liver | UBB     | NM_018955    | 1 |
| AMPK $\alpha$ 2 | Liver | PHC2    | BC068573     | 1 |
| AMPK $\alpha$ 2 | Liver | PRKCBP1 | HS569M23     | 1 |
| AMPK $\alpha$ 2 | Liver | AADAT   | NM_182662    | 1 |
| AMPK $\alpha$ 2 | Liver | TACC2   | BC015736     | 1 |
| AMPK $\alpha$ 2 | Brain | ZBED    | NM_032367    | 5 |
| AMPK $\alpha$ 2 | Brain | PPP1R7  | NM_002712    | 1 |
| AMPK $\alpha$ 2 | Brain | KHDRBS1 | BC019109     | 2 |
| AMPK $\alpha$ 2 | Brain | PRKAG1  | XM_509039    | 1 |
| AMPK $\alpha$ 2 | Brain | BRUNOL4 | XM_001128998 | 2 |
| AMPK $\alpha$ 2 | Brain | PHC2    | BC068573     | 3 |
| AMPK $\alpha$ 2 | Brain | HNRPK   | BC014980     | 1 |
| AMPK $\alpha$ 2 | Brain | EIF4A1  | NM_001416    | 1 |

**Supplementary Table 2: Primers used in mutagenesis**

| Primer name            | Sequence                        |
|------------------------|---------------------------------|
| PIAS4_C335F_F          | CCGTGCAGAGACCTTCGCACACCTGC      |
| PIAS4_C335F_R          | GCAGGTGTGCGAAGGTCTCTGCACGG      |
| AMPK $\alpha$ 1_K15R_F | GTCGTGTTTCTGCCTCTCGGCTGTCGCCATC |
| AMPK $\alpha$ 1_K15R_R | GATGGCGACAGCCGAGAGGCAGAAACACGAC |
| AMPK $\alpha$ 1_K17R_F | CCCGTCGTGTCTCTGCTTCTCGGCTGTCGC  |
| AMPK $\alpha$ 1_K17R_R | GCGACAGCCGAGAAGCAGAGACACGACGGG  |
| AMPK $\alpha$ 1_K23R_F | GACGGGCGGGTGAGGATCGGCCACTAC     |
| AMPK $\alpha$ 1_K23R_R | GTAGTGGCCGATCCTCACCCGCCCGTC     |
| AMPK $\alpha$ 1_K40R_F | GCCAACCTTCACTCTGCCGAAGGTGCCGA   |

|                         |                                                    |
|-------------------------|----------------------------------------------------|
| AMPK $\alpha$ 1_K40R_R  | TCGGCACCTTCGGCAGAGTGAAGGTTGGC                      |
| AMPK $\alpha$ 1_K42R_F  | CGGCACCTTCGGCAAAGTGAGGGTTGGCAAAC                   |
| AMPK $\alpha$ 1_K42R_R  | GTTTGCCAACCTCACTTTGCCGAAGGTGCCG                    |
| AMPK $\alpha$ 1_K45R_F  | CCCAGTCAATTCATGTCTGCCAACCTCACTTTGCC                |
| AMPK $\alpha$ 1_K45R_R  | GGCAAAGTGAAGGTTGGCAGACATGAATTGACTG<br>GG           |
| AMPK $\alpha$ 1_K52R_F  | CTTCACAGCTACTCTATGCCCAGTCAATTCATGTTT<br>GC         |
| AMPK $\alpha$ 1_K52R_R  | GCAAACATGAATTGACTGGGCATAGAGTAGCTGT<br>GAAG         |
| AMPK $\alpha$ 1_K56R_F  | CTTCTGTCGATTGAGTATCCTCACAGCTACTTTATG<br>CCC        |
| AMPK $\alpha$ 1_K56R_R  | GGGCATAAAGTAGCTGTGAGGATACTCAATCGAC<br>AGAAG        |
| AMPK $\alpha$ 1_K62R_F  | CATCAAGGCTCCGAATCCTCTGTCGATTGAGTATC                |
| AMPK $\alpha$ 1_K62R_R  | GATACTCAATCGACAGAGGATTCCGGAGCCTTGATG               |
| AMPK $\alpha$ 1_K71R_F  | TGAATTTCTCTGCGGATTCTTCCTACCACATCAAG<br>GC          |
| AMPK $\alpha$ 1_K71R_R  | GCCTTGATGTGGTAGGAAGAATCCGCAGAGAAAT<br>TCA          |
| AMPK $\alpha$ 1_K80R_F  | ATGCCTGAAAAGCCTGAGGTTCTGAATTTCTCTGC<br>G           |
| AMPK $\alpha$ 1_K80R_R  | CGCAGAGAAATTCAGAACCTCAGGCTTTTCAGGCA<br>T           |
| AMPK $\alpha$ 1_K89R_F  | AGCTTTTCAGGCATCCTCATATAATTAGACTGTAC<br>CAGGTCA     |
| AMPK $\alpha$ 1_K89R_R  | TGACCTGGTACAGTCTAATTATATGAGGATGCCTG<br>AAAAGCT     |
| AMPK $\alpha$ 1_K118R_F | TTCATCCAGCCTTCCATTCCCTACAGATATAATCAA<br>ATAGCTCTCC |
| AMPK $\alpha$ 1_K118R_R | GGAGAGCTATTTGATTATATCTGTAGGAATGGAAG<br>GCTGGATGAA  |
| AMPK $\alpha$ 1_K125R_F | CGCCGACTTTCTCTTTCATCCAGCCTTCCATTCTTA               |

|                         |                                                 |
|-------------------------|-------------------------------------------------|
| AMPK $\alpha$ 1_K125R_R | TAAGAATGGAAGGCTGGATGAAAGAGAAAGTCGG<br>CG        |
| AMPK $\alpha$ 1_K152R_F | CATATGGTGGTCCATAGAGATTTGAGACCTGAAAA<br>TGTCCTG  |
| AMPK $\alpha$ 1_K152R_R | CAGGACATTTTCAGGTCTCAAATCTCTATGGACCA<br>CCATATG  |
| AMPK $\alpha$ 1_K165R_F | GAAAGACCAAAATCAGCTATCCTTGCATTCATGTG<br>TGCATCAA |
| AMPK $\alpha$ 1_K165R_R | TTGATGCACACATGAATGCAAGGATAGCTGATTTT<br>GGTCTTTC |
| AMPK $\alpha$ 1_K235R_F | GATCCCATCACATATCTTCCTAAAAAGAGTTGGCA<br>CATGGTC  |
| AMPK $\alpha$ 1_K235R_R | GACCATGTGCCAACTCTTTTTAGGAAGATATGTGA<br>TGGGATC  |
| AMPK $\alpha$ 1_K236R_F | GAAGATCCCATCACATATCCTCTTAAAAAGAGTTG<br>GCACATGG |
| AMPK $\alpha$ 1_K236R_R | CCATGTGCCAACTCTTTTTAAGAGGATATGTGATG<br>GGATCTTC |
| AMPK $\alpha$ 1_K257R_F | CACCTGCAGCATATGTCTCAAAAGGCTAATCACAG<br>AAGG     |
| AMPK $\alpha$ 1_K257R_R | CCTTCTGTGATTAGCCTTTTGAGACATATGCTGCA<br>GGTG     |
| AMPK $\alpha$ 1_K266R_F | TTTGATTGTGGCCCTCCTCATGGGATCCACCTG               |
| AMPK $\alpha$ 1_K266R_R | CAGGTGGATCCCATGAGGAGGGCCACAATCAAA               |
| AMPK $\alpha$ 1_K271R_F | TGTTCCCTGATATCTCTGATTGTGGCCCTCTTCATG            |
| AMPK $\alpha$ 1_K271R_R | CATGAAGAGGGCCACAATCAGAGATATCAGGGAA<br>CA        |
| AMPK $\alpha$ 1_K280R_F | GATATCAGGGAACATGAATGGTTTAGACAGGACC<br>TTCCA     |
| AMPK $\alpha$ 1_K280R_R | TGGAAGGTCCTGTCTAAACCATTCATGTTCCCTGA<br>TATC     |
| AMPK $\alpha$ 1_K285R_F | GATCCTCAGGAAAGAGATATCTTGGAAGGTCCTGT<br>TTAAAC   |



|                         |                                                     |
|-------------------------|-----------------------------------------------------|
| AMPK $\alpha$ 1_K285R_R | GTTTAAACAGGACCTTCCAAGATATCTCTTTCTG<br>AGGATC        |
| AMPK $\alpha$ 1_K305R_F | TCAAACCTTTTCACATACTTCTCTTAAGGCTTCATCA<br>TCAATCATGG |
| AMPK $\alpha$ 1_K305R_R | CCATGATTGATGATGAAGCCTTAAGAGAAGTATGT<br>GAAAAGTTTGA  |
| AMPK $\alpha$ 1_K310R_F | TCCTCTTCTGAGCACTCAAACCTTTTCACATACTTCT<br>TTTAAGG    |
| AMPK $\alpha$ 1_K310R_R | CCTTAAAAGAAGTATGTGAAAGGTTTGAGTGCTCA<br>GAAGAGGA     |
| AMPK $\alpha$ 1_K349R_F | GTCGCCAAATAGAAATCTCTGGCTTCATTCATTAT<br>TCTCCTG      |
| AMPK $\alpha$ 1_K349R_R | CAGGAGAATAATGAATGAAGCCAGAGATTTCTATT<br>TGGCGAC      |
| AMPK $\alpha$ 1_K396R_F | CCTTACACCTTGGTGTGGATCTCTGTGGATTAA<br>TTCATCAAG      |
| AMPK $\alpha$ 1_K396R_R | CTTGATGAATTAATCCACAGAGATCCAAACACCA<br>AGGTGTAAGG    |
| AMPK $\alpha$ 1_K398R_F | CTTTCCTTACACCTTGGTGTCTGGATTTCTGTGGAT<br>TTAATTCATC  |
| AMPK $\alpha$ 1_K398R_R | GATGAATTAATCCACAGAAATCCAGACACCAAG<br>GTGTAAGGAAAG   |
| AMPK $\alpha$ 1_K404R_F | CTAAATGCCATTTTGCTCTCCTTACACCTTGGTGTT<br>TGGATT      |
| AMPK $\alpha$ 1_K404R_R | AATCCAAACACCAAGGTGTAAGGAGAGCAAAATG<br>GCATTTAG      |
| AMPK $\alpha$ 1_K406R_F | TTCTAAATGCCATCTTGCTTTCCTTACACCTTGGT<br>GTTTG        |
| AMPK $\alpha$ 1_K406R_R | CAAACACCAAGGTGTAAGGAAAGCAAGATGGCAT<br>TTAGGAA       |
| AMPK $\alpha$ 1_K429R_F | CCATTCATAATCCAATTGTCTGATTGCTCTACATAC<br>TTCTGCCA    |
| AMPK $\alpha$ 1_K429R_R | TGGCAGAAGTATGTAGAGCAATCAGACAATTGGA                  |

|                         |                                                                |
|-------------------------|----------------------------------------------------------------|
|                         | TTATGAATGG                                                     |
| AMPK $\alpha$ 1_K436R_F | GCAAATAATATGGGTTTACAACCCTCCATTCATAA<br>TCCAATTGTTTGATT         |
| AMPK $\alpha$ 1_K436R_R | AATCAAACAATTGGATTATGAATGGAGGGTTGTAA<br>ACCCATATTATTTGC         |
| AMPK $\alpha$ 1_K436R_F | GCAAATAATATGGGTTTACAACCCTCCATTCATAA<br>TCCAATTGTTTGATT         |
| AMPK $\alpha$ 1_K436R_R | AATCAAACAATTGGATTATGAATGGAGGGTTGTAA<br>ACCCATATTATTTGC         |
| AMPK $\alpha$ 1_K448R_F | TGCTTGTCACAGGATTCCTCCTTCGTACACGCAA                             |
| AMPK $\alpha$ 1_K448R_R | TTTGC GTGTACGAAGGAGGAATCCTGTGACAAGCA                           |
| AMPK $\alpha$ 1_K485R_F | GGAGTAGCAGTCCCTGATCTGGCTTCTGTAATTC<br>AT                       |
| AMPK $\alpha$ 1_K485R_R | ATGAAATTACAGAAGCCAGATCAGGGACTGCTAC<br>TCC                      |
| AMPK $\alpha$ 1_K515R_F | ACTTCTGAGGATCTTCCTTGAGCCTCAGCATCTGA                            |
| AMPK $\alpha$ 1_K515R_R | TCAGATGCTGAGGCTCAAGGAAGATCCTCAGAAG<br>T                        |
| AMPK $\alpha$ 1_K555R_F | GGTTCTATTGTGCAAGAATTCTAATTAGATTTGCA<br>CACATCTCAAAAATTCTATTG   |
| AMPK $\alpha$ 1_K555R_R | CAATAGAATTTTTTGGAGATGTGTGCAAATCTAATT<br>AGAATTCTTGCACAATAGAACC |

**Supplementary Table 3: Dharmacon siRNAs used in this study**

| siRNA name   | siRNA ID    | Targeting gene     |
|--------------|-------------|--------------------|
| siNT pool    | D-001810-10 |                    |
| siPias1 pool | L-059344-01 | Mouse <i>Pias1</i> |
| siPias2 pool | L-055561-01 | Mouse <i>Pias2</i> |
| siPias3 pool | L-045382-00 | Mouse <i>Pias3</i> |

|              |             |                    |
|--------------|-------------|--------------------|
| siPias4 pool | L-048649-01 | Mouse <i>Pias4</i> |
| siTsc2 pool  | L-047050-00 | Mouse <i>Tsc2</i>  |
| siPias4-10   | J-048649-10 | Mouse <i>Pias4</i> |
| siPias4-11   | J-048649-11 | Mouse <i>Pias4</i> |
| siUbc9-1     | D-040661-01 | Mouse <i>Ubc9</i>  |
| siUbc9-2     | D-040661-02 | Mouse <i>Ubc9</i>  |
| siPIAS4 pool | L-006445-00 | Human <i>PIAS4</i> |
| siUBC9 pool  | L-004910-00 | Human <i>UBC9</i>  |

**Supplementary Table 4: Primers used in Real-time qPCR:**

| Primer name                               | Sequence              |
|-------------------------------------------|-----------------------|
| Mouse_ <i>Pias1</i> _F                    | CGAGCAAAGGGAATAAGGAA  |
| Mouse_ <i>Pias1</i> _R                    | TGAAGGTGGGAGCAGGTAAG  |
| Mouse_ <i>Piasx<math>\alpha</math></i> _F | GTAAGGGTGCCCAGTGTGAC  |
| Mouse_ <i>Piasx<math>\alpha</math></i> _R | TCAGAAGATGCTCCAAGCTG  |
| Mouse_ <i>Piasx<math>\beta</math></i> _F  | GATCCCCAGTACTGTCCTCCT |
| Mouse_ <i>Piasx<math>\beta</math></i> _R  | CTGCTGGTTATGACCCCTGT  |
| Mouse_ <i>Pias3</i> _F                    | GGACGTGTCCTGTGTGTGAC  |
| Mouse_ <i>Pias3</i> _R                    | CTCTGATGCCTCCTTCTTGG  |
| Mouse_ <i>Pias4</i> _F                    | GGAGGCCAAAAACATGGTGAT |
| Mouse_ <i>Pias4</i> _R                    | GGGCTACAGTCGAACTGCAC  |
| Mouse_ <i>Gapdh</i> _F                    | TGTTCTACCCCCAATGTGT   |
| Mouse_ <i>Gapdh</i> _R                    | TGTGAGGGAGA TGCTCAGTG |

|                        |                        |
|------------------------|------------------------|
| Human_ <i>PIAS4</i> _F | GGTGAAGCTGCCGTTCTTTA   |
| Human_ <i>PIAS4</i> _R | TCTCGTTGTTCTGTGGGACTAA |
| Human_ <i>GAPDH</i> _F | CGACCACTTTGTCAAGCTCA   |
| Human_ <i>GAPDH</i> _R | TGTGAGGGAGA TGCTCAGTG  |
